# Supplementary material for: Sequencing of a Chinese tetralogy of Fallot cohort reveals clustering mutations in myogenic heart progenitors
Source: JCI Insight. 2022 Jan 25;7(2):e152198. doi: 10.1172/jci.insight.152198 (PMC8855809; doi:10.1172/jci.insight.152198)
Supplement: Supplemental data [file jciinsight-7-152198-s011.pdf]

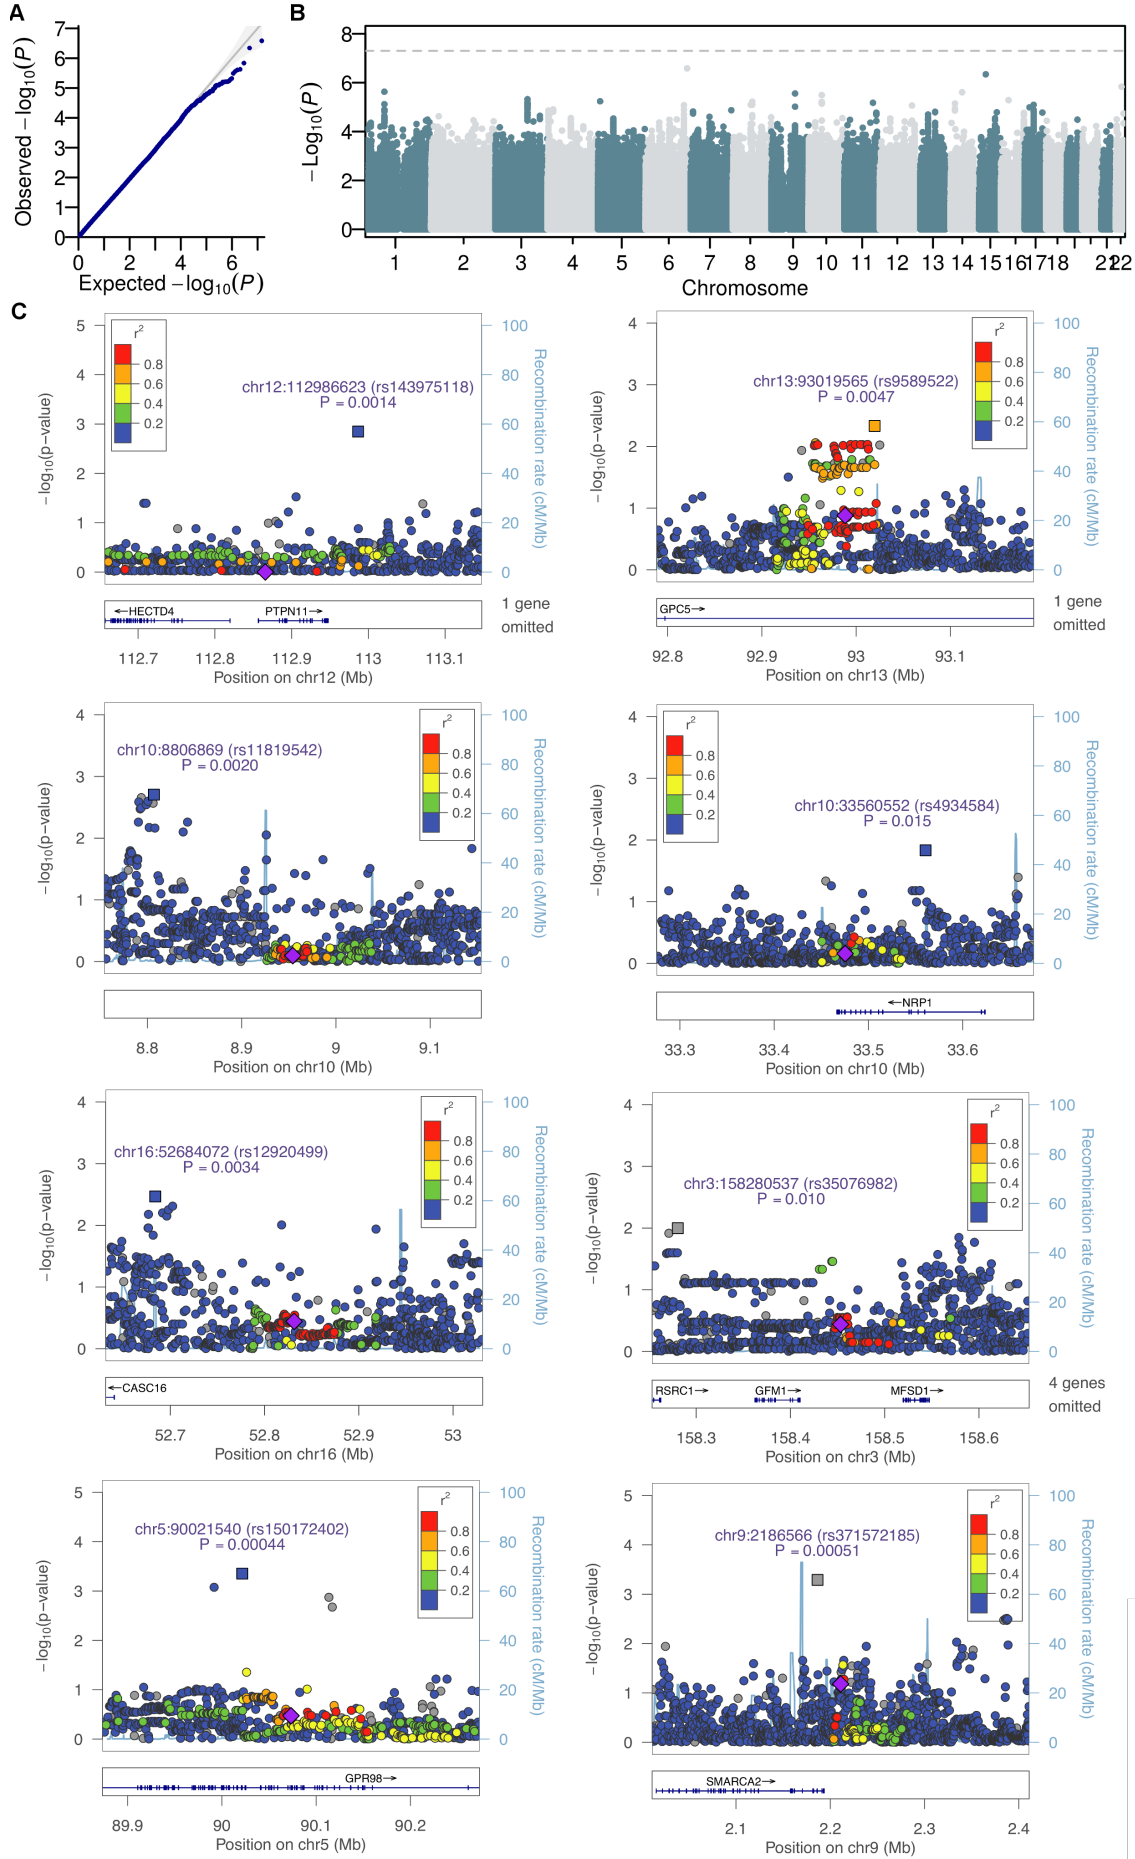

**Supplementary Figure 1. Association results of genome wide association analysis (GWAS) on common variants.** (A) Quantile-quantile plot and (B) Manhattan plot for GWAS. (C) Regional plots of loci previously reported to be associated with TOF (see Supplementary Table x). The TOF-associated SNP reported in previous publication is highlighted by purple diamond. Colour indicates the linkage disequilibrium (LD;  $r^2$ ) with the reported TOF-associated SNP. The lead SNP of each locus is denoted in square. Chromosomal position and significance of association are reported for each lead SNP.

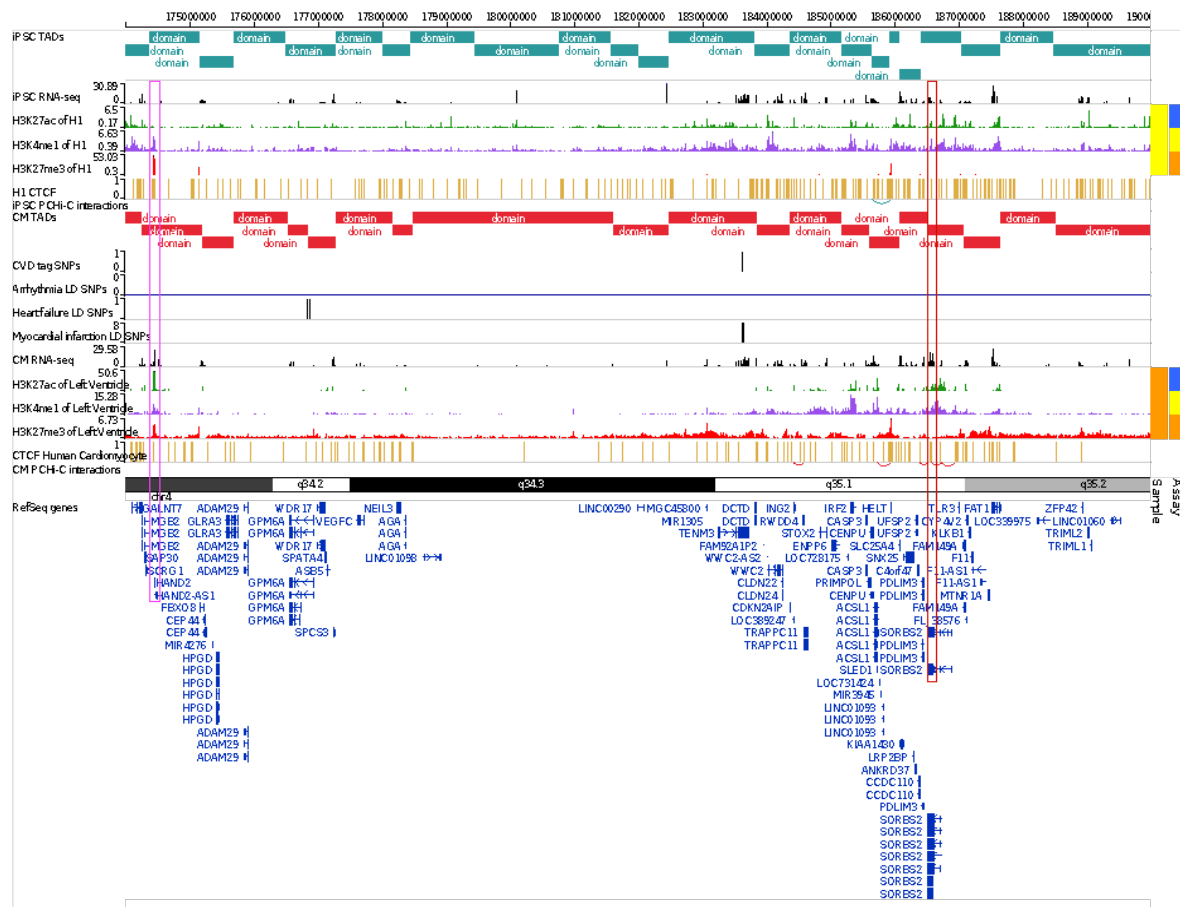

**Supplementary Figure 2. Epigenomic landscape of candidate genes in the 4q34.1q35.2 *de novo* deletion locus.** Plot of gene expression and epigenomic profiles (H3K27ac, H3K4me1 and H3K27me3) of induced pluripotent stem cells (H1 for iPSC, top) and iPSC-derived cardiomyocytes (left ventricle for CM, bottom) for genes encompassed in the 4q34.1q35.2 *de novo* deletion locus (chr4: 174000000-190000000, hg19) from the Epigenome Roadmap Project/ENCODE using the WashU Epigenome Browser (v46.2). Focus bars for *HAND2* (magenta) and *SORBS2* (red).

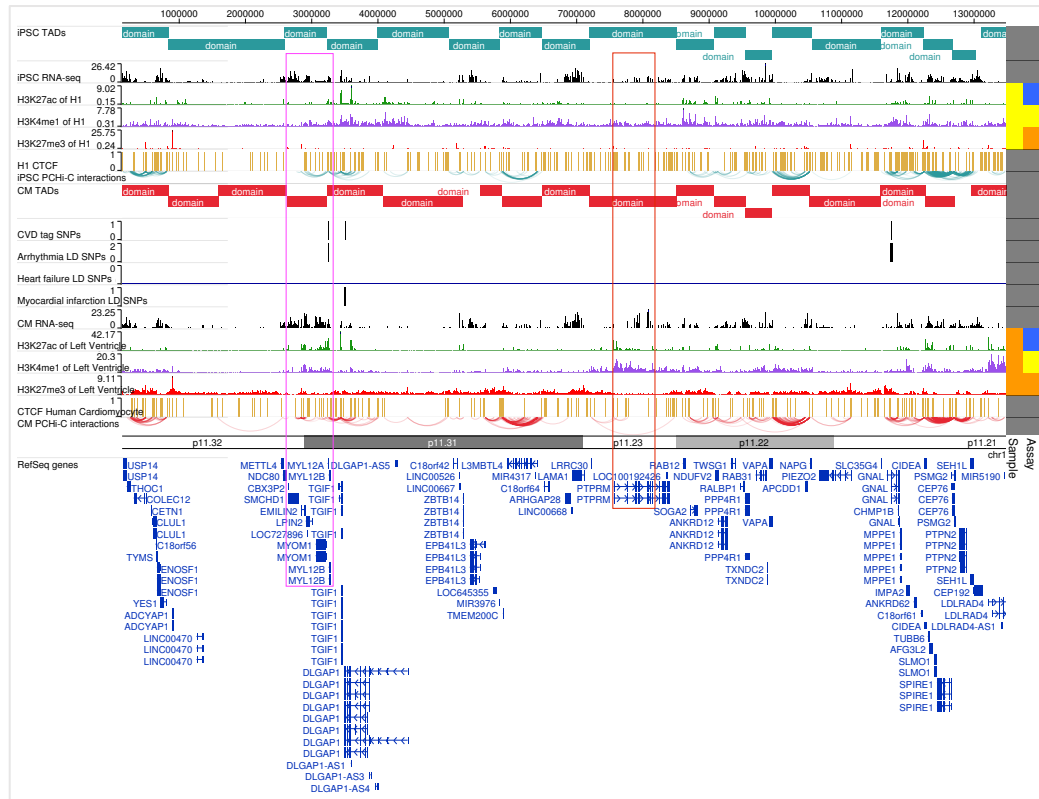

**Supplementary Figure 3. Epigenomic landscape of candidate genes in the 18p11.32p11.22 *de novo* deletion locus.** Plot of gene expression and epigenomic profiles (H3K27ac, H3K4me1 and H3K27me3) of induced pluripotent stem cells (H1 for iPSC, top) and iPSC-derived cardiomyocytes (left ventricle for CM, bottom) for genes encompassed in the 18p11.32p11.22 *de novo* deletion region from the Epigenome Roadmap Project/ENCODE using the WashU Epigenome Browser (v46.2).

### De novo mosaic deletions at 18p and 18q of T13

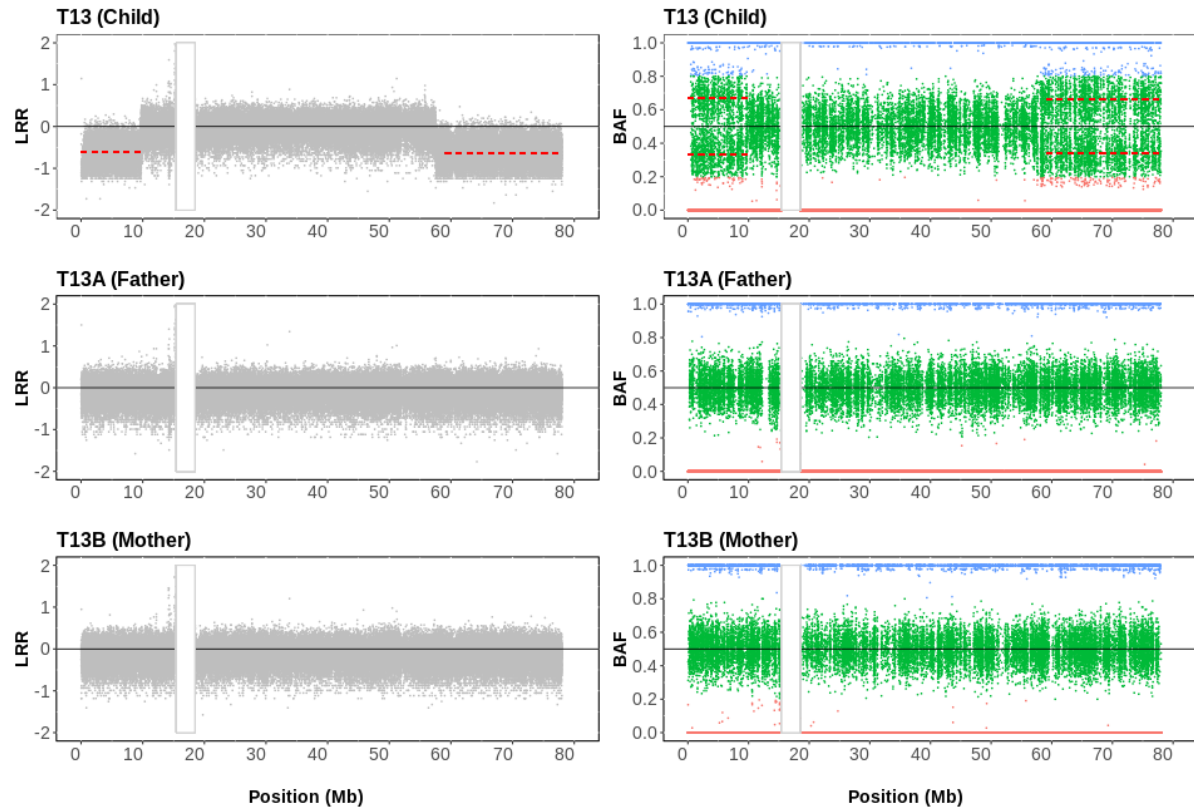

**Supplementary Figure 4. Plot of log R ratio (LRR) and B allele frequency (BAF) of the *de novo* mosaic deletions at 18p and 18q of T13 trio.** The mosaic deletions at 18p11.32p11.22 and 18q21.33q22.3 in the TOF proband (T13) are indicated by the small decrease in LRR from 0 to around -0.6 along with the narrow split in the middle BAF bands (top panel). A non-mosaic heterozygous deletion would have a larger decrease from 0 to -1 in LRR and no intermediate BAF bands. LRR and BAF bands are normal for both father (T13A; middle panel) and mother (T13B; bottom panel), indicating the absence of both deletions. Each point represents a SNP. In BAF plots the points are color-coded by genotype (red=AA, green=AB, blue=BB). The horizontal dashed red line is the mean value of LRR or BAF of the mosaic deletion region. The vertical gray rectangle represents the centromeric region.

### De novo deletion at 18p11.32p11.21 of T86

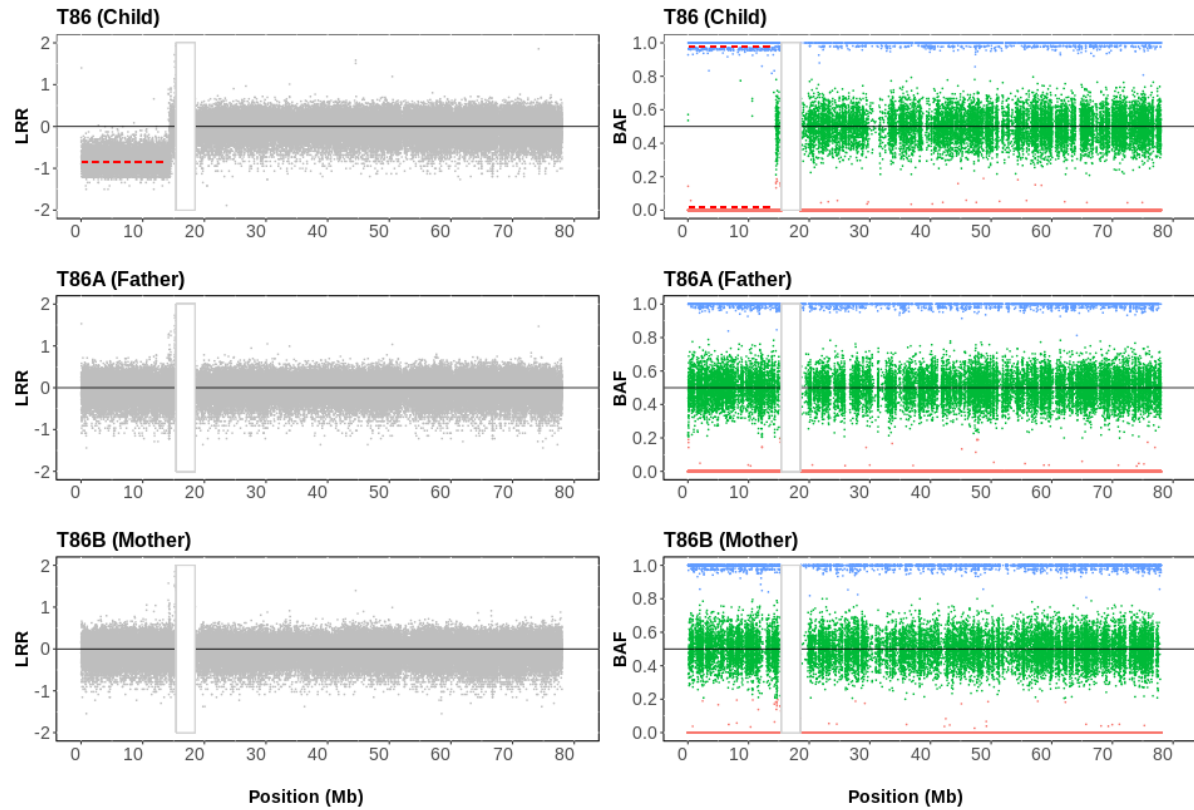

**Supplementary Figure 5. Plot of log R ratio (LRR) and B allele frequency (BAF) of the *de novo* deletion at 18p11.32p11.21 of T86 trio.** The deletion in the TOF proband (T86) is indicated by the decreased LRR from 0 to around -1 along with two BAF bands at 0 and 1. The LRR and BAF band are normal in both father (T86A; middle panel) and mother (T86B; bottom panel). Each point represents a SNP. In BAF plots the points are color-coded by genotype (red=AA, green=AB, blue=BB). The horizontal dashed red line is the mean value of LRR or BAF of the deletion region. The vertical gray rectangle represents the centromeric region.

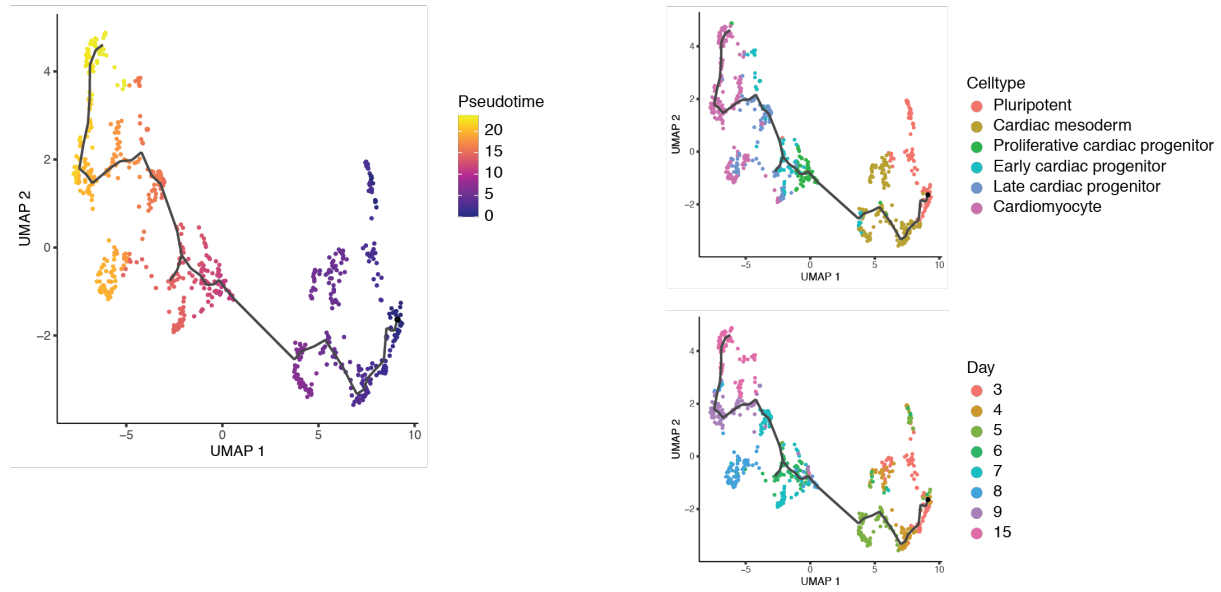

**Supplementary Figure 6. Monocle 3 pseudotime trajectory based on UMAP dimensionality reduction.** Single-cell trajectory of the hESC-cardiac differentiation constructed with Monocle 3. The uniform manifold approximation and projection (UMAP) dimensionality reduction plot is fitted with a principal graph, ordering the cells from early pseudotime to late pseudotime. Colors represent pseudotime values, cell type and time point of cell collection of the hESC cardiac differentiation protocol.
